# Supplementary material
Source: Research Square preprint supplement (doi:10.21203/rs.3.rs-9741578/v1)
Supplement: Supplementary file 1 [file 29cf571283f0dad82fb011b3.docx]

Additional files

**Additional file 1**

**File format:** PDF (.pdf)

**Title:** ¹³¹I activity concentrations in tissues over time for the different study groups.

**Description:** Table of mean decay-corrected ¹³¹I activity concentrations (%IA/g) measured in organs and tissues of male and female Sprague–Dawley rats exposed at 5 weeks of age (Table 1) and 17 weeks of age (Table 2).

**Additional file 2**

**File format:** Excel (.xlsx)

**Title:** Statistical analyses of ¹³¹I biodistribution data.

**Description:** Full statistical outputs of 2-way and 3-way ANOVA analyses for all investigated tissues and study groups, including Tukey’s multiple comparison tests for statistically significant comparisons.

**Additional file 3**

**File format:** PDF (.pdf)

**Title:** Mean absorbed dose per unit injected activity in tissues of the different study groups.

**Description:** Table of mean absorbed dose per unit injected activity (D/Ainj) in organs and tissues of male and female Sprague–Dawley rats exposed to ¹³¹I at 5 weeks of age (Table 1) and 17 weeks of age (Table 2).

**Additional file 4**

**File format:** PDF (.pdf)

**Title:** Full western blot membrane images for NIS protein expression analysis.

**Description:** Uncropped western blot membrane images showing Ponceau S staining, GAPDH loading controls, and NIS protein expression in thyroid tissue samples from male and female adult Sprague–Dawley rats at 5 or 17 weeks of age.
