# Supplementary material
Source: Research Square preprint supplement (doi:10.21203/rs.3.rs-9741578/v1)
Supplement: Supplementary file 2 [file 969de63065fcc299318bb76d.pdf]

### **Additional file 3**

#### **Mean absorbed dose per unit injected activity in examined tissues of young and adult male and female rats**

Mean absorbed dose per unit injected activity,  $D/A_{inj}(t)$ , expressed as mGy/MBq, calculated for examined organs and tissues of male and female Sprague–Dawley rats exposed to  $^{131}\text{I}$  at 5 or 17 weeks of age. Absorbed doses are presented from time of injection to each termination time point (1 h to 6 days), as well as extrapolated to infinity.

Data are based on measured activity concentrations and include contributions from emitted electrons and photons. “nd” indicates that  $D/A_{inj}$  was not calculated at the corresponding time point, as the first termination point with tissue collection was at 6 h.

**Table S3:** Mean absorbed dose per unit injected activity,  $D/A_{inj}(t)$ , to examined organs and tissues in male and female rats exposed at an age of 5 weeks. The values are given from time of injection to the 6 termination points (from 1 hour to 6 days) as well as infinity.

| Tissue                | $D/A_{inj}(t)$ [mGy/MBq] |         |          |          |        |        |          |
|-----------------------|--------------------------|---------|----------|----------|--------|--------|----------|
|                       | 1 hour                   | 6 hours | 18 hours | 24 hours | 3 days | 6 days | $\infty$ |
| <b>Male, Youngs</b>   |                          |         |          |          |        |        |          |
| Blood                 | 4.7                      | 6.8     | 8.5      | 8.8      | 9.9    | 11     | 11       |
| Bone marrow           | 0.23                     | 1.5     | 2.4      | 2.6      | 3.3    | 3.8    | 4.1      |
| Brain                 | 0.081                    | 0.40    | 0.75     | 0.84     | 1.3    | 1.7    | 2.2      |
| Carcass               | nd                       | 1.0     | 2.7      | 3.1      | 4.5    | 5.7    | 6.8      |
| Gonads                | 0.39                     | 2.2     | 3.0      | 3.1      | 3.8    | 4.4    | 5.1      |
| Heart                 | 0.18                     | 1.1     | 1.8      | 2.0      | 2.7    | 3.2    | 3.6      |
| Kidney                | 0.30                     | 1.9     | 3.0      | 3.3      | 4.3    | 5.1    | 5.7      |
| Large Intestine       | 0.25                     | 1.7     | 2.9      | 3.2      | 4.1    | 4.7    | 5.1      |
| Liver                 | 0.20                     | 1.3     | 2.3      | 2.6      | 3.6    | 4.5    | 5.2      |
| Lungs                 | 0.23                     | 1.5     | 2.8      | 3.0      | 3.9    | 4.6    | 5.0      |
| Muscle                | 0.15                     | 0.91    | 1.6      | 1.8      | 2.4    | 2.9    | 3.3      |
| Salivary gland        | 0.25                     | 1.6     | 2.7      | 2.9      | 3.7    | 4.3    | 4.8      |
| Small intestine       | 0.29                     | 2.1     | 4.2      | 4.7      | 6.0    | 6.5    | 6.9      |
| Spleen                | 0.22                     | 1.4     | 2.4      | 2.6      | 3.3    | 3.7    | 4.1      |
| Stomach               | 1.3                      | 9.6     | 18       | 19       | 22     | 23     | 24       |
| Thyroid               | 59                       | 1100    | 6000     | 8600     | 25000  | 40000  | 56000    |
| <b>Female, Youngs</b> |                          |         |          |          |        |        |          |
| Blood                 | 5.7                      | 8.1     | 10       | 10       | 11     | 12     | 12       |
| Bone marrow           | 0.29                     | 1.9     | 3.7      | 4.2      | 5.8    | 6.5    | 7.2      |
| Brain                 | 0.093                    | 0.45    | 0.87     | 1.0      | 1.9    | 2.5    | 3.3      |
| Carcass               | nd                       | 1.1     | 2.7      | 3.1      | 6.1    | 8.7    | 12       |
| Gonads                | 0.35                     | 2.3     | 4.0      | 4.4      | 6.3    | 7.2    | 7.9      |
| Heart                 | 0.22                     | 1.3     | 2.2      | 2.4      | 3.4    | 4.1    | 4.9      |
| Kidney                | 0.34                     | 2.1     | 3.4      | 3.7      | 5.1    | 6.2    | 7.2      |
| Large Intestine       | 0.38                     | 2.3     | 3.6      | 3.9      | 5.1    | 5.9    | 6.7      |
| Liver                 | 0.25                     | 1.6     | 2.9      | 3.2      | 4.9    | 6.2    | 7.5      |
| Lungs                 | 0.28                     | 1.8     | 3.2      | 3.5      | 4.7    | 5.6    | 6.5      |
| Muscle                | 0.18                     | 1.0     | 1.9      | 2.2      | 3.3    | 4.0    | 4.7      |
| Salivary gland        | 0.29                     | 1.9     | 3.2      | 3.5      | 4.6    | 5.5    | 6.4      |
| Small intestine       | 0.36                     | 2.5     | 4.7      | 5.2      | 6.7    | 7.7    | 8.6      |
| Spleen                | 0.25                     | 1.6     | 2.8      | 3.0      | 4.0    | 4.7    | 5.4      |
| Stomach               | 1.8                      | 13      | 21       | 22       | 24     | 25     | 26       |
| Thyroid               | 88                       | 1700    | 7800     | 11000    | 38000  | 65000  | 100000   |

nd indicates that  $D/A_{inj}$  was not calculated at this time point, as the first termination point with tissue collection was at 6 h.

**Table S4:** Mean absorbed dose per unit injected activity,  $D/A_{inj}(t)$ , to examined organs and tissues in male and female rats exposed at an age of 17 weeks. The absorbed doses are displayed for the 6 termination points ranging from 1 hour to 6 days, as well as infinity.

| Tissue                | $D/A_{inj}(t)$ [mGy/MBq] |         |          |          |        |        |          |
|-----------------------|--------------------------|---------|----------|----------|--------|--------|----------|
|                       | 1 hour                   | 6 hours | 18 hours | 24 hours | 3 days | 6 days | $\infty$ |
| <b>Male, Adults</b>   |                          |         |          |          |        |        |          |
| Blood                 | 3.6                      | 4.3     | 5.1      | 5.3      | 5.8    | 6.1    | 6.3      |
| Bone marrow           | 0.28                     | 0.81    | 1.3      | 1.4      | 1.8    | 2.2    | 2.6      |
| Brain                 | 0.075                    | 0.20    | 0.38     | 0.43     | 0.68   | 0.90   | 1.2      |
| Carcass               | nd                       | 0.31    | 0.82     | 1.0      | 1.5    | 2.1    | 3.1      |
| Gonads                | nd                       | 0.26    | 0.67     | 0.85     | 1.0    | 1.3    | 1.5      |
| Heart                 | 0.14                     | 0.41    | 0.78     | 0.86     | 1.2    | 1.4    | 1.6      |
| Kidney                | 0.22                     | 0.67    | 1.3      | 1.4      | 2.0    | 2.4    | 2.7      |
| Large Intestine       | 0.24                     | 0.74    | 1.4      | 1.5      | 2.0    | 2.3    | 2.6      |
| Liver                 | 0.16                     | 0.49    | 0.95     | 1.1      | 1.7    | 2.2    | 2.7      |
| Lungs                 | 0.60                     | 1.4     | 1.8      | 1.9      | 2.4    | 2.7    | 2.9      |
| Muscle                | 0.10                     | 0.29    | 0.58     | 0.65     | 0.93   | 1.1    | 1.3      |
| Salivary gland        | 0.17                     | 0.51    | 1.0      | 1.1      | 1.6    | 1.8    | 2.0      |
| Small intestine       | 0.21                     | 0.65    | 1.3      | 1.4      | 1.9    | 2.2    | 2.4      |
| Spleen                | 0.18                     | 0.54    | 1.0      | 1.1      | 1.5    | 1.7    | 1.9      |
| Stomach               | 1.1                      | 3.5     | 6.4      | 6.9      | 7.8    | 8.1    | 8.2      |
| Thyroid               | 73                       | 620     | 3500     | 4700     | 11000  | 16000  | 23000    |
| <b>Female, Adults</b> |                          |         |          |          |        |        |          |
| Blood                 | 4.3                      | 6.7     | 9.1      | 9.5      | 11     | 12     | 12       |
| Bone marrow           | 0.36                     | 2.0     | 4.0      | 4.4      | 5.7    | 6.2    | 6.7      |
| Brain                 | 0.071                    | 0.36    | 0.73     | 0.84     | 1.4    | 2.0    | 3.2      |
| Carcass               | nd                       | 0.80    | 1.8      | 2.1      | 3.5    | 4.8    | 6.1      |
| Gonads                | nd                       | 0.93    | 2.0      | 2.2      | 3.4    | 4.3    | 5.0      |
| Heart                 | 0.21                     | 1.1     | 2.1      | 2.3      | 3.1    | 3.8    | 4.4      |
| Kidney                | 0.35                     | 1.9     | 3.5      | 3.9      | 5.4    | 6.5    | 7.6      |
| Large Intestine       | 0.32                     | 1.8     | 3.6      | 4.0      | 5.3    | 6.0    | 6.7      |
| Liver                 | 0.30                     | 1.6     | 2.9      | 3.2      | 4.9    | 6.5    | 8.4      |
| Lungs                 | 0.35                     | 1.9     | 3.6      | 4        | 5.3    | 6.2    | 6.9      |
| Muscle                | 0.15                     | 0.79    | 1.6      | 1.7      | 2.4    | 2.9    | 3.4      |
| Salivary gland        | 0.33                     | 1.7     | 3.1      | 3.3      | 4.4    | 5.3    | 6.1      |
| Small intestine       | 0.50                     | 2.7     | 5.0      | 5.4      | 6.7    | 7.4    | 8.0      |
| Spleen                | 0.27                     | 1.5     | 2.8      | 3.1      | 4.2    | 4.8    | 5.4      |
| Stomach               | 1.3                      | 7.6     | 16       | 18       | 21     | 22     | 23       |
| Thyroid               | 27                       | 1,00    | 7000     | 11000    | 39000  | 62000  | 83000    |

nd indicates that  $D/A_{inj}$  was not calculated at this time point, as the first termination point with tissue collection was at 6 h.
