# Supplementary material
Source: Research Square preprint supplement (doi:10.21203/rs.3.rs-9741578/v1)
Supplement: Supplementary file 2 [file b479b2f9e2e815b828d77497.xlsx]

## Sheet: README - Additional file 2
Additional file 2
Statistical analyses of ¹³¹I biodistribution data
This file contains the full statistical outputs used in the present study.
Included sheets
	3-way ANOVA					Results of three-way ANOVA assessing the effects of time, sex, age at exposure, and their interactions on ¹³¹I activity concentrations in examined tissues.
	3-way ANOVA post hoc comparisons					Tukey’s multiple comparison tests performed following three-way ANOVA to identify significant pairwise differences between study groups within individual time points.
	2-way ANOVA					Results of two-way ANOVA using combinig age and sex to the factor group to assess the effects of time and group on ¹³¹I activity concentrations.
	2-way ANOVA post hoc comparisons time					Tukey’s multiple comparison tests performed following two-way ANOVA to identify significant differences between study groups at individual time points.
	2-way ANOVA post hoc comparisons group					Group-specific post hoc comparisons averaged across time points to assess overall differences between study groups independent of time-dependent variation.
Statistical analyses
Three-way ANOVA was performed to assess effects of:
	time
	sex
	age
and their interactions.
Two-way ANOVA was additionally performed combining age and sex to the factor group.
Multiple comparisons were performed using Tukey’s post hoc test.
Significant p-values are indicated as p < 0.05.

## Sheet: 3-way ANOVA
Organ	Time F (DFn, DFd)	p	η²	Age F (DFn, DFd)	p	η²	Sex F (DFn, DFd)	p	η²	Time×Age F (DFn, DFd)	p	η²	Time×Sex F (DFn, DFd)	p	η²	Age×Sex F (DFn, DFd)	p	η²	TimexAgexSex F (DFn, DFd)	p	η²
Blood	F(5,102) = 301.20	<0.0001	0.807	F(1,102) = 11.88	0.0008	0.006	F(1,102) = 70.56	<0.0001	0.038	F(5,102) = 9.04	<0.0001	0.024	F(5,102) = 23.74	<0.0001	0.064	F(1,102) = 23.76	<0.0001	0.013	F(5,102) = 7.77	<0.0001	0.021
Bone marrow	F(5,102) = 107.30	<0.0001	0.741	F(1,102) = 0.01	0.9044	—	F(1,102) = 33.16	<0.0001	0.046	F(5,102) = 2.68	0.0258	0.018	F(5,102) = 8.04	<0.0001	0.056	F(1,102) = 4.17	0.0438	0.006	F(5,102) = 2.02	0.0825	—
Brain	F(5,102) = 102.60	<0.0001	0.712	F(1,102) = 1.71	0.1944	—	F(1,102) = 51.18	<0.0001	0.071	F(5,102) = 2.50	0.0350	0.017	F(5,102) = 4.40	0.0011	0.031	F(1,102) = 6.98	0.0096	0.010	F(5,102) = 5.16	0.0003	0.036
Carcass	F(2,51) = 1344.00	<0.0001	0.778	F(1,51) = 350.10	<0.0001	0.101	F(1,51) = 90.81	<0.0001	0.026	F(2,51) = 101.00	<0.0001	0.058	F(2,51) = 27.34	<0.0001	0.016	F(1,51) = 23.18	<0.0001	0.007	F(2,51) = 32.40	<0.0001	0.019
Gonads	F(2,51) = 628.80	<0.0001	0.753	F(1,51) = 21.23	<0.0001	0.013	F(1,51) = 185.90	<0.0001	0.111	F(2,51) = 3.90	0.0266	0.005	F(2,51) = 70.74	<0.0001	0.085	F(1,51) = 4.07	0.0490	0.002	F(2,51) = 20.74	<0.0001	0.025
Heart	F(5,102) = 289.90	<0.0001	0.791	F(1,102) = 22.79	<0.0001	0.012	F(1,102) = 68.16	<0.0001	0.037	F(5,102) = 15.20	<0.0001	0.041	F(5,102) = 23.20	<0.0001	0.063	F(1,102) = 19.71	<0.0001	0.011	F(5,102) = 5.98	<0.0001	0.016
Kidney	F(5,102) = 111.10	<0.0001	0.725	F(1,102) = 11.63	0.0009	0.015	F(1,102) = 18.89	<0.0001	0.025	F(5,102) = 8.89	<0.0001	0.058	F(5,102) = 6.07	<0.0001	0.040	F(1,102) = 9.90	0.0022	0.013	F(5,102) = 2.71	0.0244	0.018
Large intestine	F(5,102) = 113.30	<0.0001	0.713	F(1,102) = 10.64	0.0015	0.013	F(1,102) = 28.03	<0.0001	0.035	F(5,102) = 9.25	<0.0001	0.058	F(5,102) = 10.88	<0.0001	0.068	F(1,102) = 1.35	0.2487	—	F(5,102) = 1.19	0.3211	—
Liver	F(5,102) = 189.10	<0.0001	0.739	F(1,102) = 6.62	0.0115	0.005	F(1,102) = 77.66	<0.0001	0.061	F(5,102) = 3.85	0.0031	0.015	F(5,102) = 19.30	<0.0001	0.075	F(1,102) = 25.43	<0.0001	0.020	F(5,102) = 7.75	<0.0001	0.030
Lungs	F(5,102) = 171.00	<0.0001	0.826	F(1,102) = 2.40	0.1248	—	F(1,102) = 6.15	0.0148	0.006	F(5,102) = 3.46	0.0063	0.017	F(5,102) = 2.40	0.0425	0.012	F(1,102) = 0.37	0.5430	—	F(5,102) = 3.78	0.0035	0.018
Muscle	F(5,102) = 55.47	<0.0001	0.591	F(1,102) = 9.58	0.0025	0.020	F(1,102) = 19.78	<0.0001	0.042	F(5,102) = 8.86	<0.0001	0.094	F(5,102) = 3.20	0.0100	0.034	F(1,102) = 5.13	0.0256	0.011	F(5,102) = 1.06	0.3858	—
Salivary gland	F(5,102) = 56.87	<0.0001	0.634	F(1,102) = 5.04	0.0270	0.011	F(1,102) = 13.74	0.0003	0.031	F(5,102) = 2.99	0.0146	0.033	F(5,102) = 4.87	0.0005	0.054	F(1,102) = 5.29	0.0235	0.012	F(5,102) = 1.88	0.1035	—
Small intestine	F(5,102) = 47.55	<0.0001	0.590	F(1,102) = 2.78	0.0983	—	F(1,102) = 14.29	0.0003	0.035	F(5,102) = 1.10	0.3661	—	F(5,102) = 5.67	0.0001	0.070	F(1,102) = 7.51	0.0072	0.019	F(5,102) = 2.66	0.0263	0.033
Spleen	F(5,102) = 216.50	<0.0001	0.796	F(1,102) = 10.59	0.0015	0.008	F(1,102) = 43.64	<0.0001	0.032	F(5,102) = 8.65	<0.0001	0.032	F(5,102) = 13.36	<0.0001	0.049	F(1,102) = 20.04	<0.0001	0.015	F(5,102) = 5.41	0.0002	0.020
Stomach	F(5,102) = 127.40	<0.0001	0.722	F(1,102) = 29.13	<0.0001	0.033	F(1,102) = 16.91	<0.0001	0.019	F(5,102) = 16.64	<0.0001	0.094	F(5,102) = 5.84	<0.0001	0.033	F(1,102) = 1.03	0.3134	—	F(5,102) = 1.32	0.2637	—
Thyroid	F(5,102) = 20.53	<0.0001	0.325	F(1,102) = 13.25	0.0004	0.042	F(1,102) = 64.24	<0.0001	0.204	F(5,102) = 0.24	0.9431	—	F(5,102) = 3.94	0.0026	0.062	F(1,102) = 5.33	0.023	0.017	F(5,102) = 1.15	0.3396	—

## Sheet: 3-way ANOVA post-hoc
Organ	Comparison	Mean diff.	95,00% CI of diff.	Adjusted P Value
Blood	1:Male, Adult vs. 1:Female, Adult	-0.4400	-0.5590 to -0.3210	<0.0001
	1:Male, Adult vs. 1:Male, Young	-0.3300	-0.4490 to -0.2110	<0.0001
	1:Male, Adult vs. 1:Female, Young	-0.4500	-0.5690 to -0.3310	<0.0001
	6:Male, Adult vs. 6:Female, Adult	-0.2300	-0.3490 to -0.1110	<0.0001
	6:Male, Adult vs. 6:Male, Young	-0.1200	-0.2390 to -0.000963	0.0457
	6:Male, Adult vs. 6:Female, Young	-0.1800	-0.2990 to -0.06096	<0.0001
Bone marrow	1:Male, Adult vs. 1:Female, Adult	-0.208	-0.3217 to -0.09436	<0.0001
	1:Male, Adult vs. 1:Female, Young	-0.179	-0.2926 to -0.06531	<0.0001
	1:Female, Adult vs. 1:Male, Young	0.12	0.001316 to 0.2387	0.0442
	6:Male, Adult vs. 6:Female, Adult	-0.1629	-0.2765 to -0.04923	0.0001
	6:Male, Adult vs. 6:Female, Adult	-0.1291	-0.2427 to -0.01541	0.0097
Brain	1:Male, Adult vs. 1:Female, Adult	-0.01500	-0.02196 to -0.008043	<0.0001
	1:Male, Adult vs. 1:Male, Young	-0.01000	-0.01696 to -0.003043	0.0001
	1:Male, Adult vs. 1:Female, Young	-0.01300	-0.01996 to -0.006043	<0.0001
	6:Male, Adult vs. 6:Female, Adult	-0.008800	-0.01576 to -0.001843	0.0017
Carcass	6:Male, Adult vs. 6:Female, Adult	-0.09700	-0.1190 to -0.07497	<0.0001
	6:Male, Adult vs. 6:Male, Young	-0.1470	-0.1690 to -0.1250	<0.0001
	6:Male, Adult vs. 6:Female, Young	-0.1570	-0.1790 to -0.1350	<0.0001
	6:Female, Adult vs. 6:Male, Young	-0.05000	-0.07301 to -0.02699	<0.0001
	6:Female, Adult vs. 6:Female, Young	-0.06000	-0.08301 to -0.03699	<0.0001
	24:Male, Adult vs. 24:Male, Young	-0.03000	-0.05203 to -0.007966	0.0013
	24:Male, Adult vs. 24:Female, Young	-0.04600	-0.06803 to -0.02397	<0.0001
	24:Female, Adult vs. 24:Female, Young	-0.03300	-0.05601 to -0.009986	0.0006
	144:Male, Adult vs. 144:Female, Young	-0.02460	-0.04663 to -0.002566	0.0168
Gonads	6:Male, Adult vs. 6:Female, Adult	-0.1500	-0.1799 to -0.1201	<0.0001
	6:Male, Adult vs. 6:Male, Young	-0.07000	-0.09986 to -0.04014	<0.0001
	6:Male, Adult vs. 6:Female, Young	-0.1400	-0.1699 to -0.1101	<0.0001
	6:Female, Adult vs. 6:Male, Young	0.08000	0.04881 to 0.1112	<0.0001
	6:Male, Young vs. 6:Female, Young	-0.07000	-0.1012 to -0.03881	<0.0001
	24:Male, Adult vs. 24:Female, Young	-0.04350	-0.07336 to -0.01364	0.0004
	24:Male, Young vs. 24:Female, Young	-0.04240	-0.07359 to -0.01121	0.0013
Heart	1:Male, Adult vs. 1:Female, Adult	-0.1420	-0.1824 to -0.1016	<0.0001
	1:Male, Adult vs. 1:Male, Young	-0.1220	-0.1624 to -0.08162	<0.0001
	1:Male, Adult vs. 1:Female, Young	-0.1720	-0.2124 to -0.1316	<0.0001
	1:Male, Young vs. 1:Female, Young	-0.05000	-0.09217 to -0.007826	0.0050
	6:Male, Adult vs. 6:Female, Adult	-0.07300	-0.1134 to -0.03262	<0.0001
	6:Male, Adult vs. 6:Male, Young	-0.04500	-0.08538 to -0.004622	0.0128
	6:Male, Adult vs. 6:Female, Young	-0.05900	-0.09938 to -0.01862	<0.0001
Kidney	1:Male, Adult vs. 1:Female, Adult	-0.2500	-0.3750 to -0.1250	<0.0001
	1:Male, Adult vs. 1:Male, Young	-0.2800	-0.4050 to -0.1550	<0.0001
	1:Male, Adult vs. 1:Female, Young	-0.3300	-0.4550 to -0.2050	<0.0001
	6:Male, Adult vs. 6:Female, Adult	-0.1350	-0.2600 to -0.01004	0.0195
Large intestine	1:Male, Adult vs. 1:Female, Adult	-0.1900	-0.3137 to -0.06625	<0.0001
	1:Male, Adult vs. 1:Male, Young	-0.1700	-0.2937 to -0.04625	0.0003
	1:Male, Adult vs. 1:Female, Young	-0.3800	-0.5037 to -0.2563	<0.0001
	1:Female, Adult vs. 1:Female, Young	-0.1900	-0.3193 to -0.06075	<0.0001
	1:Male, Young vs. 1:Female, Young	-0.2100	-0.3393 to -0.08075	<0.0001
	6:Male, Adult vs. 6:Female, Adult	-0.1460	-0.2697 to -0.02225	0.0054
Liver	1:Male, Adult vs. 1:Female, Adult	-0.2340	-0.2981 to -0.1699	<0.0001
	1:Male, Adult vs. 1:Male, Young	-0.1440	-0.2081 to -0.07988	<0.0001
	1:Male, Adult vs. 1:Female, Young	-0.2040	-0.2681 to -0.1399	<0.0001
	1:Female, Adult vs. 1:Male, Young	0.09000	0.02302 to 0.1570	0.0005
	6:Male, Adult vs. 6:Female, Adult	-0.1120	-0.1761 to -0.04788	<0.0001
	6:Male, Adult vs. 6:Male, Young	-0.07200	-0.1361 to -0.007875	0.0115
	6:Male, Adult vs. 6:Female, Young	-0.09200	-0.1561 to -0.02788	0.0001
Lungs	1:Male, Adult vs. 1:Male, Young	0.1500	0.04345 to 0.2565	0.0002
	6:Male, Adult vs. 6:Female, Adult	-0.1510	-0.2575 to -0.04445	0.0002
Muscle	1:Male, Adult vs. 1:Female, Adult	-0.08000	-0.1395 to -0.02049	0.0005
	1:Male, Adult vs. 1:Male, Young	-0.1000	-0.1595 to -0.04049	<0.0001
	1:Male, Adult vs. 1:Female, Young	-0.1400	-0.1995 to -0.08049	<0.0001
Salivary gland	1:Male, Adult vs. 1:Female, Adult	-0.2630	-0.4111 to -0.1149	<0.0001
	1:Male, Adult vs. 1:Male, Young	-0.2230	-0.3711 to -0.07487	<0.0001
	1:Male, Adult vs. 1:Female, Young	-0.2830	-0.4311 to -0.1349	<0.0001
Small intestine	1:Male Adult vs 1:Female Adult	-0.4300	-0.6643 to -0.1957	<0.0001
	1:Male Adult vs 1:Female Young	-0.3500	-0.5843 to -0.1157	<0.0001
	6:Male, Adult vs. 6:Female, Adult	-0.2430	-0.4773 to -0.008718	0.0327
	6:Male, Adult vs. 6:Male, Young	-0.2430	-0.4773 to -0.008718	0.0327
Spleen	1:Male, Adult vs. 1:Female, Adult	-0.1730	-0.2354 to -0.1106	<0.0001
	1:Male, Adult vs. 1:Male, Young	-0.1530	-0.2154 to -0.09065	<0.0001
	1:Male, Adult vs. 1:Female, Young	-0.1930	-0.2554 to -0.1306	<0.0001
	6:Male, Adult vs. 6:Female, Adult	-0.1150	-0.1774 to -0.05265	<0.0001
	6:Male, Adult vs. 6:Male, Young	-0.06500	-0.1274 to -0.002647	0.0308
	6:Male, Adult vs. 6:Female, Young	-0.08500	-0.1474 to -0.02265	0.0004
Stomach	1:Male, Adult vs. 1:Male, Young	-1.140	-1.810 to -0.4704	<0.0001
	1:Male, Adult vs. 1:Female, Young	-2.040	-2.710 to -1.370	<0.0001
	1:Female, Adult vs. 1:Female, Young	-1.400	-2.099 to -0.7006	<0.0001
	1:Male, Young vs. 1:Female, Young	-0.9000	-1.599 to -0.2006	0.0012
	6:Male, Adult vs. 6:Female, Adult	-0.7300	-1.400 to -0.06040	0.0173
	6:Male, Adult vs. 6:Male, Young	-0.8300	-1.500 to -0.1604	0.0024
	6:Male, Adult vs. 6:Female, Young	-0.9300	-1.600 to -0.2604	0.0003
Thyroid	24:Male, Adult vs. 24:Female, Adult	-748.0	-1239 to -256.7	<0.0001
	24:Male, Adult vs. 24:Female, Young	-633.0	-1124 to -141.7	0.0012
	72:Male, Adult vs. 72:Female, Adult	-618.0	-1109 to -126.7	0.0018
	72:Male, Adult vs. 72:Female, Young	-739.0	-1230 to -247.7	<0.0001

## Sheet: 2-way ANOVA
Organ	Time F (DFn, DFd)	p	η²	Group F (DFn, DFd)	p	η²	TimexGroup F (DFn, DFd)	p	η²
Blood	F(5, 102) = 301.2	<0.0001	0.8074	F(3, 102) = 38.17	<0.0001	0.06139	F(15, 102) = 14.65	<0.0001	0.1178
Bone marrow	F(5, 102) = 100.4	<0.0001	0.735	F(3, 102) = 11.80	<0.0001	0.0518	F(15, 102) = 4.172	<0.0001	0.0916
Brain	F(5, 102) = 102.6	<0.0001	0.7118	F(3, 102) = 21.00	<0.0001	0.0874	F(15, 102) = 4.276	<0.0001	0.0890
Carcass	F(2, 51) = 1344	<0.0001	0.7784	F(3, 51) = 164.9	<0.0001	0.1432	F(6, 51) = 58.02	<0.0001	0.1008
Gonads	F(2, 51) = 628.8	<0.0001	0.7528	F(3, 51) = 73.72	<0.0001	0.1324	F(6, 51) = 33.74	<0.0001	0.1212
Heart	F(5, 102) = 289.9	<0.0001	0.7909	F(3, 102) = 39.99	<0.0001	0.06547	F(15, 102) = 16.03	<0.0001	0.1312
Kidney	F(5, 102) = 111.1	<0.0001	0.7248	F(3, 102) = 14.72	<0.0001	0.05759	F(15, 102) = 6.373	<0.0001	0.1247
Large intestine	F(5, 102) = 113.3	<0.0001	0.7128	F(3, 102) = 14.22	<0.0001	0.05369	F(15, 102) = 7.388	<0.0001	0.1395
Liver	F(5, 102) = 189.1	<0.0001	0.7394	F(3, 102) = 39.15	<0.0001	0.09183	F(15, 102) = 11.13	<0.0001	0.1305
Lungs	F(5, 102) = 171.0	<0.0001	0.8258	F(3, 102) = 2.883	0.0394	0.008355	F(15, 102) = 3.416	0.0001	0.04949
Muscle	F(5, 102) = 55.47	<0.0001	0.5906	F(3, 102) = 12.48	<0.0001	0.07975	F(15, 102) = 4.602	<0.0001	0.1470
Salivary gland	F(5, 102) = 56.87	<0.0001	0.6337	F(3, 102) = 8.722	<0.0001	0.05832	F(15, 102) = 3.540	<0.0001	0.1184
Small intestine	F(5, 102) = 47.55	<0.0001	0.5904	F(3, 102) = 8.874	<0.0001	0.06611	F(15, 102) = 3.370	0.0001	0.1255
Spleen	F(5, 102) = 216.5	<0.0001	0.7960	F(3, 102) = 26.85	<0.0001	0.05923	F(15, 102) = 9.917	<0.0001	0.1094
Stomach	F(5, 102) = 127.4	<0.0001	0.7217	F(3, 102) = 16.72	<0.0001	0.05685	F(15, 102) = 8.212	<0.0001	0.1396
Thyroid	F(5, 102) = 20.53	<0.0001	0.3254	F(3, 102) = 29.42	<0.0001	0.2798	F(15, 102) = 1.847	0.0378	0.08783

## Sheet: 2-way ANOVA post-hoc Time
Organ	Comparison	Mean diff.	95.00% CI of diff.	Adjusted P Value
Blood	1:Male, Adult vs. 1:Female, Adult	-0.4400	-0.5232 to -0.3568	<0.0001
	1:Male, Adult vs. 1:Male, Young	-0.3300	-0.4132 to -0.2468	<0.0001
	1:Male, Adult vs. 1:Female, Young	-0.4500	-0.5332 to -0.3668	<0.0001
	1:Female, Adult vs. 1:Male, Young	0.1100	0.02315 to 0.1969	0.0070
	1:Male, Young vs. 1:Female, Young	-0.1200	-0.2069 to -0.03315	0.0027
	6:Male, Adult vs. 6:Female, Adult	-0.2300	-0.3132 to -0.1468	<0.0001
	6:Male, Adult vs. 6:Male, Young	-0.1200	-0.2032 to -0.03685	0.0015
	6:Male, Adult vs. 6:Female, Young	-0.1800	-0.2632 to -0.09685	<0.0001
	6:Female, Adult vs. 6:Male, Young	0.1100	0.02315 to 0.1969	0.0070
Bone marrow	1:Male, Adult vs. 1:Female, Adult	-0.21	-0.2924 to -0.1276	<0.0001
	1:Male, Adult vs. 1:Male, Young	-0.09	-0.1724 to -0.007648	0.0264
	1:Male, Adult vs. 1:Female, Young	-0.18	-0.2624 to -0.09765	<0.0001
	1:Female, Adult vs. 1:Male, Young	0.12	0.03399 to 0.2060	0.0024
	1:Male, Young vs. 1:Female, Young	-0.09	-0.1760 to -0.003986	0.0366
	6:Male, Adult vs. 6:Female, Adult	-0.16	-0.2424 to -0.07765	<0.0001
	6:Male, Adult vs. 6:Female, Young	-0.13	-0.2124 to -0.04765	0.0004
	18:Female, Adult vs. 18:Male, Young	0.0902	0.004186 to 0.1762	0.036
Brain	1:Male, Adult vs. 1:Female, Adult	-0.015	-0.01986 to -0.01014	<0.0001
	1:Male, Adult vs. 1:Male, Young	-0.01	-0.01486 to -0.005140	<0.0001
	1:Male, Adult vs. 1:Female, Young	-0.013	-0.01786 to -0.008140	<0.0001
	6:Male, Adult vs. 6:Female, Adult	-0.0088	-0.01366 to -0.003940	<0.0001
	6:Male, Adult vs. 6:Female, Young	-0.0058	-0.01066 to -0.0009399	0.0125
	72:Male, Adult vs. 72:Female, Adult	-0.005	-0.009860 to -0.0001399	0.0413
Carcass	6:Male, Adult vs. 6:Female, Adult	-0.09700	-0.1141 to -0.07991	<0.0001
	6:Male, Adult vs. 6:Male, Young	-0.1470	-0.1641 to -0.1299	<0.0001
	6:Male, Adult vs. 6:Female, Young	-0.1570	-0.1741 to -0.1399	<0.0001
	6:Female, Adult vs. 6:Male, Young	-0.05000	-0.06785 to -0.03215	<0.0001
	6:Female, Adult vs. 6:Female, Young	-0.06000	-0.07785 to -0.04215	<0.0001
	24:Male, Adult vs. 24:Male, Young	-0.03000	-0.04709 to -0.01291	0.0001
	24:Male, Adult vs. 24:Female, Young	-0.04600	-0.06309 to -0.02891	<0.0001
	24:Female, Adult vs. 24:Female, Young	-0.03300	-0.05085 to -0.01515	<0.0001
	144:Male, Adult vs. 144:Female, Young	-0.02460	-0.04169 to -0.007508	0.0020
	144:Female, Adult vs. 144:Female, Young	-0.01900	-0.03685 to -0.001148	0.0329
Gonads	6:Male, Adult vs. 6:Female, Adult	-0.1500	-0.1732 to -0.1268	<0.0001
	6:Male, Adult vs. 6:Male, Young	-0.07000	-0.09316 to -0.04684	<0.0001
	6:Male, Adult vs. 6:Female, Young	-0.1400	-0.1632 to -0.1168	<0.0001
	6:Female, Adult vs. 6:Male, Young	0.08000	0.05581 to 0.1042	<0.0001
	6:Male, Young vs. 6:Female, Young	-0.07000	-0.09419 to -0.04581	<0.0001
	24:Male, Adult vs. 24:Female, Young	-0.04350	-0.06666 to -0.02034	<0.0001
	24:Female, Adult vs. 24:Female, Young	-0.02900	-0.05319 to -0.004807	0.0128
	24:Male, Young vs. 24:Female, Young	-0.04240	-0.06659 to -0.01821	0.0001
Heart	1:Male, Adult vs. 1:Female, Adult	-0.1420	-0.1702 to -0.1138	<0.0001
	1:Male, Adult vs. 1:Male, Young	-0.1220	-0.1502 to -0.09379	<0.0001
	1:Male, Adult vs. 1:Female, Young	-0.1720	-0.2002 to -0.1438	<0.0001
	1:Female, Adult vs. 1:Female, Young	-0.03000	-0.05946 to -0.0005396	0.0443
	1:Male, Young vs. 1:Female, Young	-0.05000	-0.07946 to -0.02054	0.0001
	6:Male, Adult vs. 6:Female, Adult	-0.07300	-0.1012 to -0.04479	<0.0001
	6:Male, Adult vs. 6:Male, Young	-0.04500	-0.07321 to -0.01679	0.0004
	6:Male, Adult vs. 6:Female, Young	-0.05900	-0.08721 to -0.03079	<0.0001
Kidney	1:Male, Adult vs. 1:Female, Adult	-0.2500	-0.3373 to -0.1627	<0.0001
	1:Male, Adult vs. 1:Male, Young	-0.2800	-0.3673 to -0.1927	<0.0001
	1:Male, Adult vs. 1:Female, Young	-0.3300	-0.4173 to -0.2427	<0.0001
	6:Male, Adult vs. 6:Female, Adult	-0.1350	-0.2223 to -0.04771	0.0006
	6:Male, Adult vs. 6:Female, Young	-0.09500	-0.1823 to -0.007712	0.0273
Large intestine	1:Male, Adult vs. 1:Female, Adult	-0.1900	-0.2764 to -0.1036	<0.0001
	1:Male, Adult vs. 1:Male, Young	-0.1700	-0.2564 to -0.08356	<0.0001
	1:Male, Adult vs. 1:Female, Young	-0.3800	-0.4664 to -0.2936	<0.0001
	1:Female, Adult vs. 1:Female, Young	-0.1900	-0.2803 to -0.09971	<0.0001
	1:Male, Young vs. 1:Female, Young	-0.2100	-0.3003 to -0.1197	<0.0001
	6:Male, Adult vs. 6:Female, Adult	-0.1460	-0.2324 to -0.05956	0.0001
	6:Male, Adult vs. 6:Female, Young	-0.09600	-0.1824 to -0.009556	0.0233
Liver	1:Male, Adult vs. 1:Female, Adult	-0.2340	-0.2788 to -0.1892	<0.0001
	1:Male, Adult vs. 1:Male, Young	-0.1440	-0.1888 to -0.09921	<0.0001
	1:Male, Adult vs. 1:Female, Young	-0.2040	-0.2488 to -0.1592	<0.0001
	1:Female, Adult vs. 1:Male, Young	0.09000	0.04321 to 0.1368	<0.0001
	1:Male, Young vs. 1:Female, Young	-0.06000	-0.1068 to -0.01321	0.0062
	6:Male, Adult vs. 6:Female, Adult	-0.1120	-0.1568 to -0.06721	<0.0001
	6:Male, Adult vs. 6:Male, Young	-0.07200	-0.1168 to -0.02721	0.0003
	6:Male, Adult vs. 6:Female, Young	-0.09200	-0.1368 to -0.04721	<0.0001
Lungs	1:Male, Adult vs. 1:Male, Young	0.1500	0.07557 to 0.2244	<0.0001
	1:Male, Adult vs. 1:Female, Young	0.08000	0.005572 to 0.1544	0.0300
	1:Female, Adult vs. 1:Male, Young	0.1000	0.02226 to 0.1777	0.0060
	6:Male, Adult vs. 6:Female, Adult	-0.1510	-0.2254 to -0.07657	<0.0001
	6:Male, Adult vs. 6:Male, Young	-0.08100	-0.1554 to -0.006572	0.0273
	6:Male, Adult vs. 6:Female, Young	-0.1010	-0.1754 to -0.02657	0.0033
Muscle	1:Male, Adult vs. 1:Female, Adult	-0.08000	-0.1216 to -0.03843	<0.0001
	1:Male, Adult vs. 1:Male, Young	-0.1000	-0.1416 to -0.05843	<0.0001
	1:Male, Adult vs. 1:Female, Young	-0.1400	-0.1816 to -0.09843	<0.0001
	1:Female, Adult vs. 1:Female, Young	-0.06000	-0.1034 to -0.01658	0.0027
	6:Male, Adult vs. 6:Female, Adult	-0.04500	-0.08657 to -0.003428	0.0285
	6:Male, Adult vs. 6:Female, Young	-0.04300	-0.08457 to -0.001428	0.0397
Salivary gland	1:Male, Adult vs. 1:Female, Adult	-0.2630	-0.3665 to -0.1595	<0.0001
	1:Male, Adult vs. 1:Male, Young	-0.2230	-0.3265 to -0.1195	<0.0001
	1:Male, Adult vs. 1:Female, Young	-0.2830	-0.3865 to -0.1795	<0.0001
	6:Male, Adult vs. 6:Female, Adult	-0.1100	-0.2135 to -0.006524	0.0326
	6:Male, Adult vs. 6:Female, Young	-0.1100	-0.2135 to -0.006524	0.0326
Small intestine	1:Male, Adult vs. 1:Female, Adult	-0.4300	-0.5937 to -0.2663	<0.0001
	1:Male, Adult vs. 1:Male, Young	-0.2300	-0.3937 to -0.06634	0.0022
	1:Male, Adult vs. 1:Female, Young	-0.3500	-0.5137 to -0.1863	<0.0001
	1:Female, Adult vs. 1:Male, Young	0.2000	0.02907 to 0.3709	0.0150
	6:Male, Adult vs. 6:Female, Adult	-0.2430	-0.4067 to -0.07934	0.0011
	6:Male, Adult vs. 6:Male, Young	-0.2430	-0.4067 to -0.07934	0.0011
	6:Male, Adult vs. 6:Female, Young	-0.2130	-0.3767 to -0.04934	0.0053
Spleen	1:Male, Adult vs. 1:Female, Adult	-0.1730	-0.2166 to -0.1294	<0.0001
	1:Male, Adult vs. 1:Male, Young	-0.1530	-0.1966 to -0.1094	<0.0001
	1:Male, Adult vs. 1:Female, Young	-0.1930	-0.2366 to -0.1494	<0.0001
	6:Male, Adult vs. 6:Female, Adult	-0.1150	-0.1586 to -0.07144	<0.0001
	6:Male, Adult vs. 6:Male, Young	-0.06500	-0.1086 to -0.02144	0.0010
	6:Male, Adult vs. 6:Female, Young	-0.08500	-0.1286 to -0.04144	<0.0001
	6:Female, Adult vs. 6:Male, Young	0.05000	0.004507 to 0.09549	0.0253
Stomach	1:Male, Adult vs. 1:Male, Young	-1.140	-1.608 to -0.6722	<0.0001
	1:Male, Adult vs. 1:Female, Young	-2.040	-2.508 to -1.572	<0.0001
	1:Female, Adult vs. 1:Male, Young	-0.5000	-0.9886 to -0.01145	0.0428
	1:Female, Adult vs. 1:Female, Young	-1.400	-1.889 to -0.9114	<0.0001
	1:Male, Young vs. 1:Female, Young	-0.9000	-1.389 to -0.4114	<0.0001
	6:Male, Adult vs. 6:Female, Adult	-0.7300	-1.198 to -0.2622	0.0005
	6:Male, Adult vs. 6:Male, Young	-0.8300	-1.298 to -0.3622	<0.0001
	6:Male, Adult vs. 6:Female, Young	-0.9300	-1.398 to -0.4622	<0.0001
Thyroid	6:Male, Adult vs. 6:Female, Young	-348.0	-691.2 to -4.823	0.0456
	18:Male, Adult vs. 18:Female, Adult	-461.0	-804.2 to -117.8	0.0037
	18:Male, Adult vs. 18:Female, Young	-414.0	-757.2 to -70.82	0.0113
	24:Male, Adult vs. 24:Female, Adult	-748.0	-1091 to -404.8	<0.0001
	24:Male, Adult vs. 24:Female, Young	-633.0	-976.2 to -289.8	<0.0001
	24:Female, Adult vs. 24:Male, Young	437.0	78.56 to 795.4	0.0102
	72:Male, Adult vs. 72:Female, Adult	-618.0	-961.2 to -274.8	<0.0001
	72:Male, Adult vs. 72:Female, Young	-739.0	-1082 to -395.8	<0.0001
	72:Male, Young vs. 72:Female, Young	-403.0	-761.4 to -44.56	0.0210
	144:Male, Adult vs. 144:Female, Adult	-357.0	-700.2 to -13.82	0.0382
	144:Male, Adult vs. 144:Female, Young	-439.0	-782.2 to -95.82	0.0063

## Sheet: 2-way ANOVA post-hoc Group 
Organ	Comparison	Mean diff.	95.00% CI of diff.	Adjusted P Value
Blood	Male, Adult vs. Female, Adult	-0.1247	-0.1587 to -0.09079	<0.0001
	Male, Adult vs. Male, Young	-0.07818	-0.1121 to -0.04424	<0.0001
	Male, Adult vs. Female, Young	-0.1113	-0.1453 to -0.07737	<0.0001
	Female, Adult vs. Male, Young	0.04655	0.01109 to 0.08201	0.0048
Bone marrow	Male, Adult vs. Female, Adult	-0.06985	-0.1035 to -0.03623	<0.0001
	Male, Adult vs. Female, Young	-0.05083	-0.08444 to -0.01721	0.0008
	Female, Adult vs. Male, Young	0.05153	0.01642 to 0.08665	0.0012
Brain	Male, Adult vs. Female, Adult	-0.00538	-0.007364 to -0.003396	<0.0001
	Male, Adult vs. Male, Young	-0.002168	-0.004152 to -0.0001842	0.0264
	Male, Adult vs. Female, Young	-0.004647	-0.006631 to -0.002663	<0.0001
	Female, Adult vs. Male, Young	0.003212	0.001139 to 0.005284	0.0006
	Male, Young vs. Female, Young	-0.002478	-0.004551 to -0.0004060	0.0123
Carcass	Male, Adult vs. Female, Adult	-0.03853	-0.04840 to -0.02867	<0.0001
	Male, Adult vs. Male, Young	-0.06320	-0.07307 to -0.05333	<0.0001
	Male, Adult vs. Female, Young	-0.07587	-0.08573 to -0.06600	<0.0001
	Female, Adult vs. Male, Young	-0.02467	-0.03497 to -0.01436	<0.0001
	Female, Adult vs. Female, Young	-0.03733	-0.04764 to -0.02703	<0.0001
	Male, Young vs. Female, Young	-0.01267	-0.02297 to -0.002360	0.0103
Gonads	Male, Adult vs. Female, Adult	-0.05699	-0.09684 to -0.01713	0.0018
	Male, Adult vs. Male, Young	-0.03964	-0.07668 to -0.002607	0.0311
	Male, Adult vs. Female, Young	-0.05090	-0.08793 to -0.01386	0.0029
	Female, Adult vs. Male, Young	0.01734	-0.02160 to 0.05628	0.6490
	Female, Adult vs. Female, Young	0.006092	-0.03285 to 0.04503	0.9766
	Male, Young vs. Female, Young	-0.01125	-0.04069 to 0.01819	0.7488
Heart	Male, Adult vs. Female, Adult	-0.04047	-0.05198 to -0.02895	<0.0001
	Male, Adult vs. Male, Young	-0.02937	-0.04088 to -0.01785	<0.0001
	Male, Adult vs. Female, Young	-0.04153	-0.05305 to -0.03002	<0.0001
	Male, Young vs. Female, Young	-0.01217	-0.02419 to -0.0001395	0.0463
Kidney	Male, Adult vs. Female, Adult	-0.0739	-0.1095 to -0.03827	<0.0001
	Male, Adult vs. Male, Young	-0.06467	-0.1003 to -0.02903	<0.0001
	Male, Adult vs. Female, Young	-0.0765	-0.1121 to -0.04087	<0.0001
Large intestine	Male, Adult vs. Female, Adult	-0.06305	-0.09834 to -0.02776	<0.0001
	Male, Adult vs. Male, Young	-0.0432	-0.07849 to -0.007909	0.0098
	Male, Adult vs. Female, Young	-0.08358	-0.1189 to -0.04829	<0.0001
	Male, Young vs. Female, Young	-0.04038	-0.07724 to -0.003524	0.0259
Liver	Male, Adult vs. Female, Adult	-0.07013	-0.08842 to -0.05185	<0.0001
	Male, Adult vs. Male, Young	-0.03855	-0.05684 to -0.02026	<0.0001
	Male, Adult vs. Female, Young	-0.05763	-0.07592 to -0.03935	<0.0001
	Female, Adult vs. Male, Young	0.03158	0.01248 to 0.05068	0.0002
Lungs	Female, Adult vs. Male, Young	0.03387	0.002131 to 0.06560	0.0317
Muscle	Male, Adult vs. Female, Adult	-0.03154	-0.04851 to -0.01457	<0.0001
	Male, Adult vs. Male, Young	-0.02519	-0.04216 to -0.008217	0.0011
	Male, Adult vs. Female, Young	-0.03544	-0.05241 to -0.01847	<0.0001
Salivary gland	Male, Adult vs. Female, Adult	-0.07023	-0.1125 to -0.02799	0.0002
	Male, Adult vs. Male, Young	-0.05313	-0.09538 to -0.01089	0.0075
	Male, Adult vs. Female, Young	-0.06958	-0.1118 to -0.02734	0.0002
Small intestine	Male, Adult vs. Female, Adult	-0.1206	-0.1874 to -0.05379	<0.0001
	Male, Adult vs. Male, Young	-0.08155	-0.1484 to -0.01474	0.0101
	Male, Adult vs. Female, Young	-0.1008	-0.1676 to -0.03395	0.0009
Spleen	Male, Adult vs. Female, Adult	-0.05455	-0.07233 to -0.03677	<0.0001
	Male, Adult vs. Male, Young	-0.03805	-0.05583 to -0.02027	<0.0001
	Male, Adult vs. Female, Young	-0.04853	-0.06632 to -0.03075	<0.0001
Stomach	Male, Adult vs. Female, Adult	-0.2709	-0.4619 to -0.07997	0.0019
	Male, Adult vs. Male, Young	-0.3388	-0.5298 to -0.1479	<0.0001
	Male, Adult vs. Female, Young	-0.5027	-0.6936 to -0.3117	<0.0001
	Female, Adult vs. Female, Young	-0.2317	-0.4312 to -0.03228	0.0159
Thyroid	Male, Adult vs. Female, Adult	-400.3	-540.4 to -260.2	<0.0001
	Male, Adult vs. Male, Young	-230.7	-370.8 to -90.57	0.0002
	Male, Adult vs. Female, Young	-452	-592.1 to -311.9	<0.0001
	Female, Adult vs. Male, Young	169.7	23.34 to 316.0	0.0162
	Male, Young vs. Female, Young	-221.3	-367.7 to -75.00	0.0008
