# Supplementary material
Source: Research Square preprint supplement (doi:10.21203/rs.3.rs-9741578/v1)
Supplement: Supplementary file 3 [file 96c556a24c07999595daf3d3.pdf]

## **Additional file 1**

### **<sup>131</sup>I activity concentrations in examined tissues over time in young and adult male and female rats**

Mean decay-corrected <sup>131</sup>I activity concentrations,  $c_{tissue}(t)$ , expressed as percentage injected activity per gram tissue (%IA/g), measured in examined organs and tissues of male and female Sprague–Dawley rats exposed to <sup>131</sup>I at 5 or 17 weeks of age. Measurements were obtained at six time points ranging from 1 h to 6 days post-injection. Data are presented as mean (SEM).

For the adult exposure groups, rats in the 1-hour group were not euthanised exactly 1 h after injection. “nd” indicates that no samples were collected at the corresponding time point.

**Table S1:**  $^{131}\text{I}$  activity concentration,  $c_{\text{tissue}}$ , over time in male and female rats exposed at an age of 5 weeks. The activity concentration is decay corrected to time of injection and displayed for 6 measured time points ranging from 1 hour to 6 days for examined organs and tissues. The injected activity was on average 360 (SEM = 5) kBq.

| Tissue                | $c_{\text{tissue}}(t)$ [%IA/g] |                 |                 |                 |                 |                   |
|-----------------------|--------------------------------|-----------------|-----------------|-----------------|-----------------|-------------------|
|                       | 1 hour                         | 6 hours         | 18 hours        | 24 hours        | 3 days          | 6 days            |
| <b>Male, Youngs</b>   |                                |                 |                 |                 |                 |                   |
| Blood                 | 0.52 (0.02)                    | 0.24 (0.01)     | 0.020 (0.001)   | 0.019 (0.002)   | 0.010 (0.001)   | 0.0042 (0.0006)   |
| Bone marrow           | 0.26 (0.01)                    | 0.14 (0.01)     | 0.0078 (0.0013) | 0.0077 (0.0008) | 0.0043 (0.0004) | 0.00011 (0.00002) |
| Brain                 | 0.020 (0.001)                  | 0.0097 (0.0009) | 0.0019 (0.0003) | 0.0020 (0.0002) | 0.0022 (0.0002) | 0.00083 (0.00007) |
| Carcass               | nd                             | 0.22 (0.01)     | nd              | 0.042 (0.005)   | nd              | 0.020 (0.001)     |
| Gonads                | 0.53 (0.04)                    | 0.13 (0.01)     | 0.011 (0.001)   | 0.0076 (0.0006) | 0.0084 (0.0017) | 0.0015 (0.0002)   |
| Heart                 | 0.18 (0.01)                    | 0.082 (0.006)   | 0.0086 (0.0003) | 0.0078 (0.0007) | 0.0050 (0.0004) | 0.0011 (0.0000)   |
| Kidney                | 0.39 (0.11)                    | 0.15 (0.01)     | 0.033 (0.015)   | 0.016 (0.001)   | 0.012 (0.002)   | 0.0046 (0.0006)   |
| Large intestine       | 0.30 (0.03)                    | 0.16 (0.01)     | 0.014 (0.001)   | 0.013 (0.002)   | 0.0075 (0.0019) | 0.0026 (0.0003)   |
| Liver                 | 0.22 (0.01)                    | 0.12 (0.01)     | 0.014 (0.001)   | 0.017 (0.002)   | 0.013 (0.001)   | 0.0055 (0.0006)   |
| Lungs                 | 0.26 (0.01)                    | 0.15 (0.01)     | 0.021 (0.007)   | 0.013 (0.001)   | 0.0073 (0.0005) | 0.0038 (0.0004)   |
| Muscle                | 0.13 (0.01)                    | 0.069 (0.004)   | 0.0083 (0.0012) | 0.0052 (0.0005) | 0.0042 (0.0004) | 0.0013 (0.0001)   |
| Salivary gland        | 0.30 (0.01)                    | 0.14 (0.01)     | 0.013 (0.001)   | 0.011 (0.001)   | 0.0067 (0.0007) | 0.0030 (0.0006)   |
| Small intestine       | 0.34 (0.01)                    | 0.32 (0.03)     | 0.016 (0.001)   | 0.015 (0.001)   | 0.0065 (0.0014) | 0.0022 (0.0003)   |
| Spleen                | 0.24 (0.01)                    | 0.12 (0.01)     | 0.013 (0.003)   | 0.0078 (0.0008) | 0.0032 (0.0003) | 0.0015 (0.0002)   |
| Stomach               | 1.9 (0.3)                      | 1.3 (0.3)       | 0.073 (0.004)   | 0.039 (0.004)   | 0.027 (0.018)   | 0.0038 (0.0006)   |
| Thyroid               | 140 (25)                       | 440 (20)        | 660 (54)        | 620 (18)        | 490 (20)        | 310 (40)          |
| <b>Female, Youngs</b> |                                |                 |                 |                 |                 |                   |
| Blood                 | 0.64 (0.06)                    | 0.30 (0.01)     | 0.030 (0.003)   | 0.025 (0.004)   | 0.0089 (0.0005) | 0.0081 (0.0012)   |
| Bone marrow           | 0.35 (0.04)                    | 0.19 (0.02)     | 0.015 (0.003)   | 0.055 (0.016)   | 0.0045 (0.0003) | 0.00045 (0.00013) |
| Brain                 | 0.023 (0.002)                  | 0.011 (0.001)   | 0.0068 (0.0016) | 0.0059 (0.0022) | 0.0029 (0.0005) | 0.0019 (0.0003)   |
| Carcass               | nd                             | 0.23 (0.01)     | nd              | 0.058 (0.006)   | nd              | 0.032 (0.001)     |
| Gonads                | 0.46 (0.05)                    | 0.20 (0.01)     | 0.020 (0.003)   | 0.05 (0.016)    | 0.010 (0.002)   | 0.016 (0.006)     |
| Heart                 | 0.23 (0.03)                    | 0.096 (0.004)   | 0.013 (0.001)   | 0.010 (0.001)   | 0.0047 (0.0003) | 0.0038 (0.0006)   |
| Kidney                | 0.44 (0.03)                    | 0.17 (0.01)     | 0.024 (0.003)   | 0.022 (0.004)   | 0.011 (0.001)   | 0.0096 (0.0014)   |
| Large intestine       | 0.51 (0.06)                    | 0.18 (0.01)     | 0.021 (0.007)   | 0.017 (0.002)   | 0.0062 (0.0003) | 0.0052 (0.0005)   |
| Liver                 | 0.28 (0.03)                    | 0.14 (0.01)     | 0.027 (0.004)   | 0.028 (0.004)   | 0.015 (0.001)   | 0.014 (0.003)     |
| Lungs                 | 0.3 (0.03)                     | 0.17 (0.01)     | 0.019 (0.002)   | 0.017 (0.002)   | 0.0070 (0.0001) | 0.0064 (0.0008)   |
| Muscle                | 0.17 (0.02)                    | 0.072 (0.003)   | 0.0076 (0.0011) | 0.024 (0.011)   | 0.0037 (0.0011) | 0.0022 (0.0003)   |
| Salivary gland        | 0.36 (0.04)                    | 0.17 (0.01)     | 0.015 (0.001)   | 0.015 (0.002)   | 0.0079 (0.0016) | 0.0045 (0.0007)   |
| Small intestine       | 0.46 (0.05)                    | 0.29 (0.02)     | 0.027 (0.002)   | 0.021 (0.002)   | 0.011 (0.005)   | 0.0060 (0.0010)   |
| Spleen                | 0.28 (0.04)                    | 0.14 (0.01)     | 0.011 (0.001)   | 0.011 (0.002)   | 0.0037 (0.0006) | 0.0027 (0.0003)   |
| Stomach               | 2.8 (0.4)                      | 1.4 (0.1)       | 0.055 (0.010)   | 0.052 (0.009)   | 0.011 (0.001)   | 0.0078 (0.0011)   |
| Thyroid               | 220 (22)                       | 660 (88)        | 730 (79)        | 940 (100)       | 890 (230)       | 550 (60)          |

Data is presented as mean (SEM) (n=5). nd indicates that no samples were collected at the correlating time points.

**Table S2:**  $^{131}\text{I}$  activity concentration  $c_{\text{tissue}}$  in %IA/g over time in male and female rats exposed at an age of 17 weeks. The activity concentration is decay corrected to time of injection and displayed for 6 measured time points ranging from 1 hour to 6 days, and a selection of different organs and tissues. The injected activity was on average 360 (SEM = 5) kBq. It should be noted that all rats in the 1-hour-group were not euthanized exactly 1 h after injection.

| Tissue                | $c_{\text{tissue}}(t)$ [%IA/g] |                 |                 |                 |                  |                   |
|-----------------------|--------------------------------|-----------------|-----------------|-----------------|------------------|-------------------|
|                       | 1 hour                         | 6 hours         | 18 hours        | 24 hours        | 3 days           | 6 days            |
| <b>Male, Adults</b>   |                                |                 |                 |                 |                  |                   |
| Blood                 | 0.19 (0.02)                    | 0.12 (0.01)     | 0.015 (0.001)   | 0.013 (0.002)   | 0.0035 (0.0005)  | 0.0026 (0.0003)   |
| Bone marrow           | 0.17 (0.05)                    | 0.060 (0.004)   | 0.064 (0.036)   | 0.0073 (0.0008) | 0.0055 (0.002)   | 0.0032 (0.0017)   |
| Brain                 | 0.010 (0.002)                  | 0.0052 (0.0005) | 0.0044 (0.0029) | 0.0013 (0.0002) | 0.0019 (0.0007)  | 0.00082 (0.00014) |
| Carcass               | nd                             | 0.073 (0.002)   | nd              | 0.012 (0.001)   | nd               | 0.0074 (0.0006)   |
| Gonads                | nd                             | 0.060 (0.004)   | nd              | 0.0065 (0.0007) | nd               | 0.00024 (0.00001) |
| Heart                 | 0.058 (0.005)                  | 0.037 (0.003)   | 0.0054 (0.0003) | 0.0044 (0.0007) | 0.0022 (0.0004)  | 0.0013 (0.0001)   |
| Kidney                | 0.11 (0.01)                    | 0.075 (0.010)   | 0.011 (0.001)   | 0.012 (0.002)   | 0.0055 (0.0003)  | 0.0041 (0.0004)   |
| Large intestine       | 0.13 (0.05)                    | 0.084 (0.011)   | 0.0088 (0.0014) | 0.0081 (0.0011) | 0.0045 (0.0016)  | 0.0025 (0.0003)   |
| Liver                 | 0.076 (0.008)                  | 0.048 (0.004)   | 0.0098 (0.0007) | 0.011 (0.002)   | 0.0080 (0.0006)  | 0.0054 (0.0005)   |
| Lungs                 | 0.41 (0.07)                    | 0.069 (0.005)   | 0.0089 (0.0005) | 0.0088 (0.0015) | 0.0035 (0.0006)  | 0.0022 (0.0003)   |
| Muscle                | 0.030 (0.001)                  | 0.029 (0.005)   | 0.0034 (0.0005) | 0.0026 (0.0004) | 0.0012 (0.0003)  | 0.00067 (0.00008) |
| Salivary gland        | 0.077 (0.007)                  | 0.060 (0.004)   | 0.0075 (0.0006) | 0.0063 (0.0009) | 0.0026 (0.00069) | 0.0015 (0.0001)   |
| Small intestine       | 0.11 (0.02)                    | 0.077 (0.004)   | 0.0086 (0.0003) | 0.0088 (0.0016) | 0.0035 (0.0005)  | 0.0025 (0.0008)   |
| Spleen                | 0.087 (0.014)                  | 0.055 (0.004)   | 0.0062 (0.0004) | 0.0061 (0.0009) | 0.0016 (0.0001)  | 0.0013 (0.0003)   |
| Stomach               | 0.76 (0.08)                    | 0.47 (0.05)     | 0.041 (0.004)   | 0.031 (0.003)   | 0.0036 (0.0003)  | 0.0042 (0.0017)   |
| Thyroid               | 79 (18)                        | 310 (20)        | 320 (29)        | 310 (59)        | 150 (19)         | 110 (13)          |
| <b>Female, Adults</b> |                                |                 |                 |                 |                  |                   |
| Blood                 | 0.63 (0.09)                    | 0.35 (0.03)     | 0.056 (0.009)   | 0.031 (0.004)   | 0.018 (0.003)    | 0.0075 (0.0008)   |
| Bone marrow           | 0.38 (0.05)                    | 0.22 (0.02)     | 0.098 (0.052)   | 0.022 (0.005)   | 0.0073 (0.0007)  | 0.0018 (0.0009)   |
| Brain                 | 0.025 (0.003)                  | 0.014 (0.001)   | 0.0062 (0.0017) | 0.0022 (0.0005) | 0.0069 (0.0012)  | 0.0016 (0.0002)   |
| Carcass               | nd                             | 0.17 (0.01)     | nd              | 0.025 (0.004)   | nd               | 0.013 (0.001)     |
| Gonads                | nd                             | 0.21 (0.01)     | nd              | 0.021 (0.003)   | nd               | 0.0067 (0.0017)   |
| Heart                 | 0.20 (0.02)                    | 0.11 (0.01)     | 0.020 (0.003)   | 0.010 (0.002)   | 0.0082 (0.0013)  | 0.0029 (0.0003)   |
| Kidney                | 0.36 (0.04)                    | 0.21 (0.01)     | 0.036 (0.006)   | 0.026 (0.005)   | 0.021 (0.003)    | 0.0080 (0.0008)   |
| Large intestine       | 0.32 (0.08)                    | 0.23 (0.01)     | 0.033 (0.005)   | 0.018 (0.002)   | 0.011 (0.002)    | 0.0042 (0.0005)   |
| Liver                 | 0.31 (0.05)                    | 0.16 (0.01)     | 0.034 (0.005)   | 0.030 (0.008)   | 0.033 (0.005)    | 0.012 (0.001)     |
| Lungs                 | 0.36 (0.05)                    | 0.22 (0.01)     | 0.038 (0.005)   | 0.021 (0.003)   | 0.014 (0.003)    | 0.0053 (0.0005)   |
| Muscle                | 0.11 (0.04)                    | 0.074 (0.009)   | 0.037 (0.024)   | 0.037 (0.024)   | 0.028 (0.024)    | 0.0014 (0.0001)   |
| Salivary gland        | 0.34 (0.14)                    | 0.17 (0.01)     | 0.032 (0.01)    | 0.016 (0.002)   | 0.015 (0.004)    | 0.0033 (0.0003)   |
| Small intestine       | 0.54 (0.22)                    | 0.32 (0.04)     | 0.038 (0.006)   | 0.021 (0.002)   | 0.011 (0.001)    | 0.0040 (0.0004)   |
| Spleen                | 0.26 (0.04)                    | 0.17 (0.01)     | 0.029 (0.005)   | 0.014 (0.002)   | 0.0084 (0.0023)  | 0.0031 (0.0004)   |
| Stomach               | 1.4 (0.2)                      | 1.2 (0.2)       | 0.23 (0.04)     | 0.077 (0.023)   | 0.023 (0.005)    | 0.0054 (0.0005)   |
| Thyroid               | 66 (13)                        | 540 (66)        | 780 (96)        | 1100 (350)      | 770 (97)         | 470 (47)          |

Data is presented as the mean value (n=5-6) plus standard error of the mean (SEM). nd indicates that no samples were collected at the correlating time points.
