# Supplementary material
Source: Research Square preprint supplement (doi:10.21203/rs.3.rs-9741578/v1)

# Additional file 4

## **Full uncropped western blot membrane images used for NIS protein quantification**

Uncropped western blot membrane images showing Ponceau S staining, GAPDH loading controls, and NIS protein expression in thyroid tissue samples from male and female Sprague–Dawley rats at the age of 5 and 17 weeks.

Membranes are shown at the exposure times used for quantification. Samples are grouped according to sex and age at exposure and are labeled accordingly.

# Membrane 1

Ponceau S staining

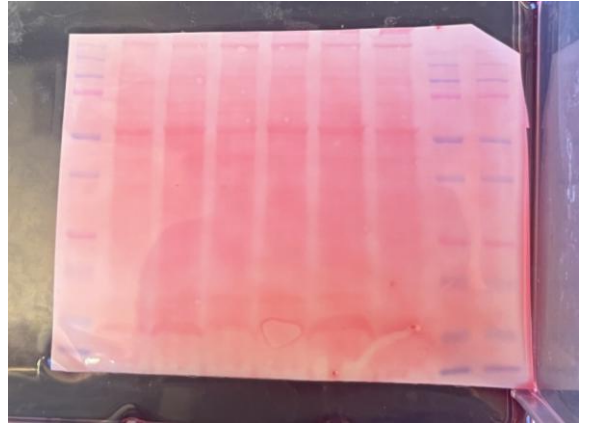

GAPDH (500 ms exposure)

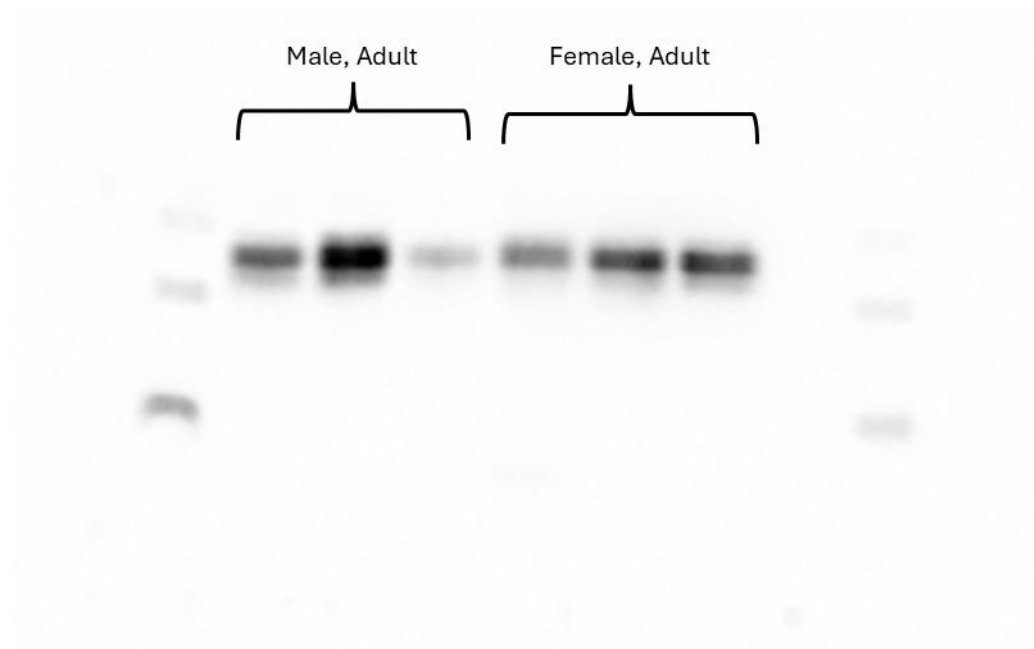

NIS (10 s exposure)

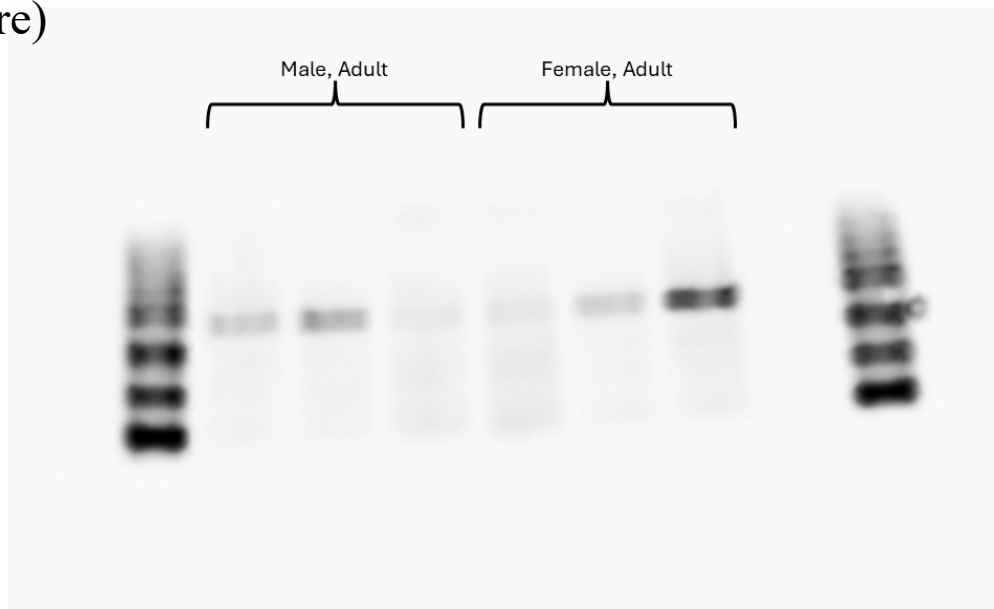

# Membrane 2

Ponceau S staining

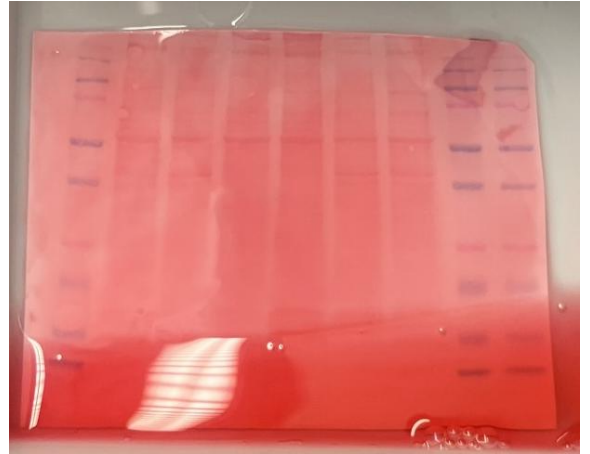

GAPDH (100 ms exposure)

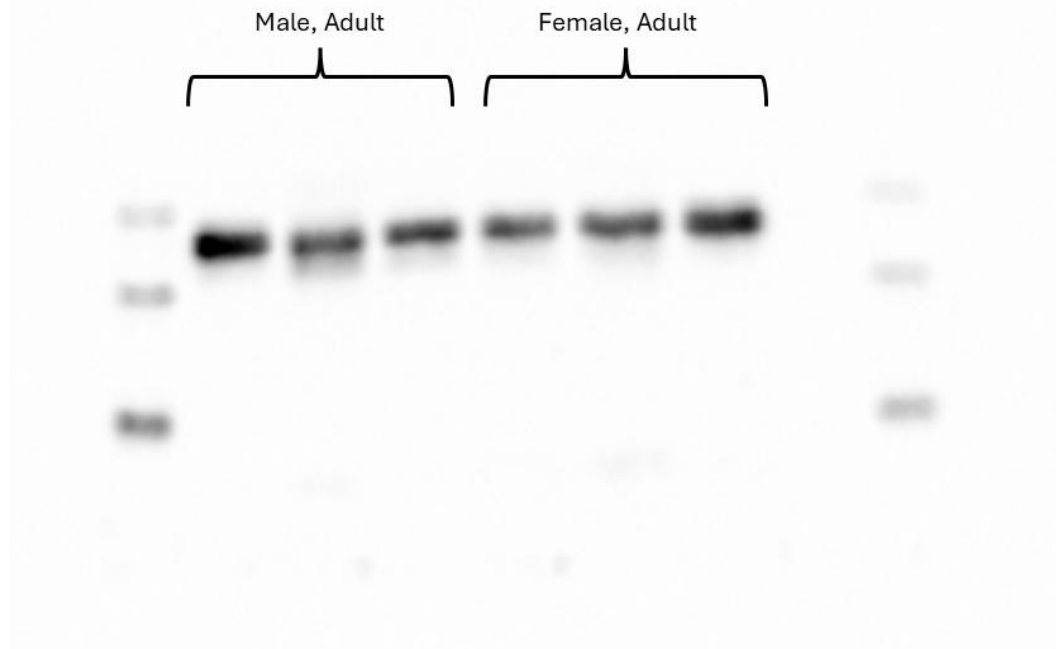

NIS (10 s exposure)

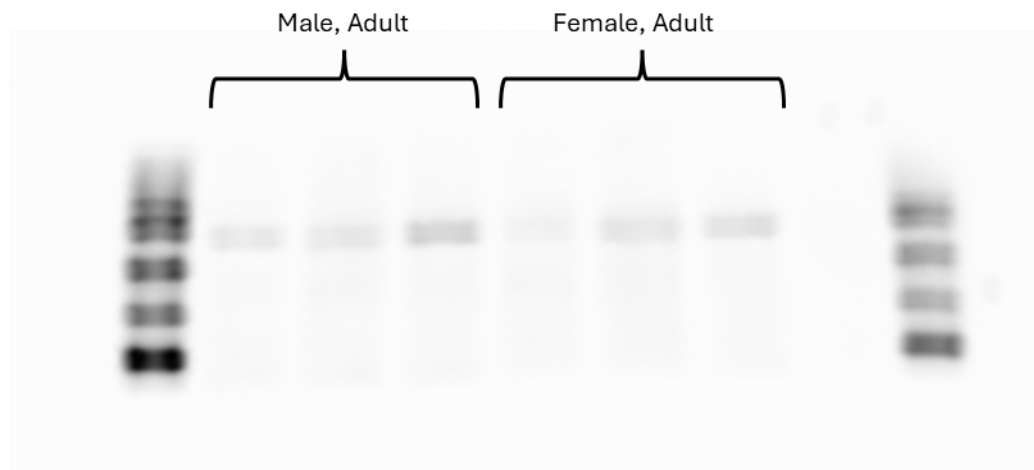

Supplement: Supplementary file 4 [file d332d1adec634174fcb439dc.pdf]
